## Linkage mapping of yeast cross protection connects gene expression variation to a higher-order organismal trait

Tara N. Stuecker<sup>1</sup>, Amanda N. Scholes<sup>1,2</sup>, and Jeffrey A. Lewis<sup>1\*</sup>

<sup>1</sup> Department of Biological Sciences, University of Arkansas, Fayetteville, Arkansas, 72701 USA

<sup>2</sup> Interdisciplinary Graduate Program in Cell and Molecular Biology, University of Arkansas, Fayetteville, Arkansas, 72701 USA

\* Corresponding author:

Jeffrey A. Lewis  
Department of Biological Sciences  
University of Arkansas  
850 W. Dickson St., SCEN 601  
Fayetteville, AR 72701  
E-mail: [lewisja@uark.edu](mailto:lewisja@uark.edu)  
Tel: +1.479.575.7740

## Abstract

Gene expression variation is extensive in nature, and is hypothesized to play a major role in shaping phenotypic diversity. However, connecting differences in gene expression across individuals to higher-order organismal traits is not trivial. In many cases, gene expression variation may be evolutionarily neutral, and in other cases expression variation may only affect phenotype under specific conditions. To understand connections between gene expression variation and stress defense phenotypes, we have been leveraging extensive natural variation in the gene expression response to acute ethanol in laboratory and wild *Saccharomyces cerevisiae* strains. Previous work found that the genetic architecture underlying these expression differences included dozens of “hotspot” loci that affected many transcripts *in trans*. In the present study, we provide new evidence that one of these expression QTL hotspot loci is responsible for natural variation in one particular stress defense phenotype—ethanol-induced cross protection against severe doses of H<sub>2</sub>O<sub>2</sub>. The causative polymorphism is in the heme-activated transcription factor Hap1p, which we show directly impacts cross protection, but not the basal H<sub>2</sub>O<sub>2</sub> resistance of unstressed cells. This provides further support that distinct cellular mechanisms underlie basal and acquired stress resistance. We also show that the Hap1p-dependent cross protection relies on novel regulation of cytosolic catalase T (Ctt1p) during ethanol stress in wild strains. Because ethanol accumulation precedes aerobic respiration and accompanying reactive oxygen species formation, wild strains with the ability to anticipate impending oxidative stress would likely be at an advantage. This study highlights how strategically chosen traits that best correlate with gene expression changes can improve our power to identify novel connections between gene expression variation and higher-order organismal phenotypes.

## Introduction

A fundamental question in genetics is how individuals with extremely similar genetic makeups can have dramatically different characteristics. One hypothesis is that a small number of regulatory polymorphisms can have large effects on gene expression, leading to the extensive phenotypic variation we see across individuals. In fact, gene expression variation is hypothesized to underlie the extensive phenotypic differences we see between humans and chimpanzees despite >98% DNA sequence identity [1, 2]. This hypothesis is supported by numerous examples of gene expression variation affecting higher-order organismal traits. For example, human genome-wide association studies (GWAS) have found that a substantial fraction of disease-associated variants are concentrated in non-coding regulatory DNA regions [3-8]. Further examples include gene expression variation being linked to differences in metabolism [9-11], physiology [12-16], morphology [17-23], and behavior [24-27].

While gene expression variation is pervasive, there is often a lack of obvious phenotype associated with differentially expressed genes. This can occur for a variety of reasons. First, a large fraction of expression variation has been postulated to be evolutionarily neutral with no effect on organismal fitness [28-30]. Alternatively, some gene expression differences may only be associated with phenotypic variation under certain conditions. This is supported by the observation that the predictive power of expression quantitative trait loci (eQTL) mapping studies on higher-order phenotypes can be poor unless multiple environments are considered [31]. Similarly, tissue-specific eQTLs are more likely to map to known disease-associated loci identified from GWAS [32, 33]. Finally, co-regulation of genes that share the same upstream signaling network and transcription factors ensures that many of the genes whose expression differences correlate with phenotype are not truly causative.

Thus, a major challenge for connecting gene expression variation to downstream effects on higher-order traits is the choice of which conditions and traits to examine. To this end, we have been leveraging natural variation in the model eukaryote *Saccharomyces cerevisiae*, and a phenotype called acquired stress resistance. Many studies have shown a poor correlation between genes that respond to stress and their importance for surviving stress [34-43]. Thus, we and others have argued that the role of stress-activated gene expression is not to survive the initial insult, but instead protects cells from impending severe stress through a phenomenon called acquired stress resistance [44, 45]. Acquired stress resistance (sometimes referred to as “induced tolerance” or the “adaptive response”) occurs when cells pretreated with a mild dose of stress gain the ability to survive an otherwise lethal dose of severe stress. Notably, acquired stress resistance can occur when the mild and severe stresses are the same (same-stress protection) or across pairs of different stresses (cross protection). This phenomenon has been observed in diverse organisms ranging from bacteria to higher eukaryotes including humans [44-50]. The specific mechanisms governing acquisition of higher stress resistance are poorly understood, but there are wide reaching implications. In humans, ischemic preconditioning (transient ischemia followed by reperfusion—i.e. mild stress pretreatment followed by severe stress) may improve outcomes of cardiovascular surgery [51-54], while transient ischemic attacks (“mini-strokes”) may protect the brain during massive ischemic stroke [55-57]. Thus, understanding the genetic basis of acquired stress resistance in model organisms holds promise for mitigating the effects of stress in humans.

A previous study found that a commonly used S288c lab strain is unable to acquire further ethanol resistance when pretreated with a mild dose of ethanol [44]. We found this phenotype to be surprising, considering the unique role ethanol plays in the life history of *Saccharomyces* yeast, where the evolution of aerobic fermentation gave yeast an advantage over ethanol-sensitive competitors [58]. Because ethanol is a self-imposed stress that induces a robust stress response [59-63], we expected that ethanol should provoke acquired stress

## QTL Mapping of Yeast Cross Protection

resistance in wild yeast strains. Indeed, this turned out to be the case, with the majority of tested wild strains acquiring resistance to severe ethanol following a mild ethanol treatment [45]. Furthermore, this phenotype correlated with extensive differences in the transcriptional response to acute ethanol stress in the lab strain when compared to a wild vineyard (M22) and wild oak (YPS163) strain (>28% of S288c genes were differentially expressed at an FDR of 0.01) [45, 64]. We performed linkage mapping of S288c crossed to a wild vineyard strain (M22) and wild oak strain (YPS163), and observed numerous “hotspots” where the same eQTL loci affects the expression of a large number of transcripts (anywhere from 10 – 500 transcripts per hotspot) [64].

In the present study, we provide new evidence that one of these eQTL hotspot loci is responsible for natural variation in acquired stress resistance, namely the ability of ethanol to cross protect against oxidative stress in the form of hydrogen peroxide. The causative polymorphism is in the heme-activated transcription factor Hap1p, which we show directly impacts cross protection, but not the basal resistance of unstressed cells. Finally, we show that the Hap1p effect is mediated through novel regulation of cytosolic catalase T (Ctt1p) during ethanol stress in wild strains. This study highlights how strategically chosen traits that best correlate with gene expression changes can improve our power to identify novel connections between gene expression variation and higher-order organismal phenotypes.

## Results

### The Genetic Basis of Natural Variation in Yeast Cross Protection.

We previously found that an S288c-derived lab strain was unable to acquire further ethanol resistance when pretreated with a mild dose of ethanol, in contrast to the vast majority of ~50 diverse yeast strains [45]. In addition to the S288c strain’s acquired ethanol resistance defect, ethanol also failed to cross protect against other subsequent stresses [44, 65]. In nature, wild yeast cells ferment sugars to ethanol, and then shift to a respiratory metabolism that generates endogenous reactive oxygen species [66-68]. Thus, we hypothesized that ethanol might cross protect against oxidative stress in wild yeast strains. We tested this hypothesis by assessing whether mild ethanol treatment would protect a wild oak strain (YPS163) from severe oxidative stress in the form of hydrogen peroxide (H<sub>2</sub>O<sub>2</sub>). Cross protection assays were performed by exposing cells to a mild, sublethal dose of ethanol (5% v/v) for 60 min, followed by exposure to a panel of 11 increasingly severe doses of H<sub>2</sub>O<sub>2</sub> (see Materials and Methods). Confirming the observations of Berry and Gasch [44], ethanol failed to cross protect against H<sub>2</sub>O<sub>2</sub> in S288c, and in fact slightly exacerbated H<sub>2</sub>O<sub>2</sub> toxicity (Fig 1). In contrast, ethanol strongly cross protected against H<sub>2</sub>O<sub>2</sub> in YPS163 (Fig 1).

The inability of ethanol to induce acquired stress resistance in S288c correlates with thousands of differences in ethanol-dependent gene expression in comparison to wild strains that can acquire ethanol resistance [45, 64]. In light of this observation, and the known dependency of cross protection on stress-activated gene expression changes [44], we hypothesized that differences in cross protection against H<sub>2</sub>O<sub>2</sub> by ethanol may be linked to differential gene expression. To test this, we performed quantitative trait loci (QTL) mapping using the same mapping population as our original eQTL study that mapped the genetic architecture of ethanol-responsive gene expression [64]. Specifically, we conducted QTL mapping of both basal and acquired H<sub>2</sub>O<sub>2</sub> resistance in 44 F<sub>2</sub> progeny of S288c crossed with YPS163 (see Materials and Methods). While we found no significant QTLs for basal H<sub>2</sub>O<sub>2</sub> resistance, we did find a significant QTL peak on chromosome XII for cross protection (Fig 2). It is unlikely that our failure to detect a chromosome XII QTL for basal H<sub>2</sub>O<sub>2</sub> resistance was due to a lack of statistical power, because two independent basal H<sub>2</sub>O<sub>2</sub> resistance QTL studies using millions of S288c x YPS163 F<sub>2</sub> segregants also found no significant associations at this locus

## QTL Mapping of Yeast Cross Protection

[69, 70]. Instead, it is likely that the genetic basis of natural variation in acquired stress resistance is distinct from the basal resistance of unstressed cells (see Discussion).

The significant QTL for cross protection was located near a known polymorphism in *HAP1*, a heme-dependent transcription factor that controls genes involved in aerobic respiration [71-73], sterol biosynthesis [74-76], and interestingly, oxidative stress [76, 77]. S288c harbors a known defect in *HAP1*, where a Ty1 transposon insertion in the 3' end of the gene's coding region has been shown to reduce its function [78]. In fact, we previously hypothesized that the defective *HAP1* allele was responsible for the inability of S288c to acquire further resistance to ethanol. This turned out to not be the case, as a YPS163 *hap1* $\Delta$  strain was still fully able to acquire ethanol resistance, despite notable differences in the gene expression response to ethanol in the mutant [45]. Likewise, despite previous studies implicating Hap1p as a regulator of oxidative stress defense genes [76, 77], *HAP1* is apparently dispensable for same-stress acquired H<sub>2</sub>O<sub>2</sub> resistance [47]. These observations suggest that the molecular mechanisms underlying various acquired stress resistance phenotypes can differ, even when the identity of the secondary stress is the same.

### **Ethanol fails to cross protect against severe H<sub>2</sub>O<sub>2</sub> in strains lacking *HAP1* function.**

Because we previously implicated *HAP1* as a major ethanol-responsive eQTL hotspot affecting over 100 genes, we hypothesized that ethanol-induced cross protection against H<sub>2</sub>O<sub>2</sub> may depend upon Hap1p-regulated genes. However, it was formally possible that *HAP1* was merely linked to the truly causal polymorphism. Thus, we performed a series of experiments to definitively test whether the polymorphism in *HAP1* was causative for the S288c strain's inability to acquire H<sub>2</sub>O<sub>2</sub> resistance following ethanol pretreatment. First, we deleted *HAP1* in the YPS163 background and found that the YPS163 *hap1* $\Delta$  mutant had highly diminished acquired H<sub>2</sub>O<sub>2</sub> resistance (Figs 3B and 3C). Second, we applied an approach called reciprocal hemizyosity analysis [79], where each *HAP1* allele is analyzed in an otherwise isogenic S288c-YPS163 hybrid background (see Fig 3A for a schematic). In each of the two reciprocal strains, one allele of *HAP1* is deleted, producing a hybrid strain containing either the S288c or YPS163 *HAP1* allele in single copy (i.e. hemizygous for *HAP1*). We found that the hybrid strain containing the *YPS163\_HAP1* allele showed full cross protection, while the strain containing the *S288c\_HAP1* allele showed none (Figure 3B and 3C). There was no difference in basal stress resistance in the reciprocal strains, providing an additional line of evidence that the genetic basis of basal and acquired stress resistance is distinct. Furthermore, the YPS163 *hap1* $\Delta$  mutant was unaffected for acquired H<sub>2</sub>O<sub>2</sub> resistance when mild H<sub>2</sub>O<sub>2</sub> or mild NaCl were used as mild stress pretreatments (S1 Fig), suggesting that Hap1p plays a distinct role in ethanol-induced cross protection (see Discussion).

### **Strains lacking *HAP1* function show decreased catalase expression and activity during ethanol stress.**

Because Hap1p is a transcription factor, we hypothesized that acquired H<sub>2</sub>O<sub>2</sub> resistance relied on Hap1p-dependent expression of a stress protectant protein. We reasoned that the putative stress protectant protein should have the following properties: i) a biological function consistent with H<sub>2</sub>O<sub>2</sub> detoxification or damage repair, ii) reduced ethanol-responsive expression in S288c versus YPS163, iii) be a target gene of the *HAP1* eQTL hotspot, and iv) possess evidence of regulation by Hap1p.

We first looked for overlap between our previously identified *HAP1* eQTL hotspot (encompassing 376 genes) and genes with significantly reduced ethanol-responsive induction in S288c versus YPS163 (309 genes) [64]. Twenty-seven genes overlapped for both criteria, including several that directly defend against reactive oxygen species (*TSA2* encoding thioredoxin peroxidase, *SOD2* encoding mitochondrial manganese superoxide dismutase, *CTT1* encoding cytosolic catalase T, and *GSH1* encoding  $\gamma$ -glutamylcysteine synthetase (Fig 4A and

## QTL Mapping of Yeast Cross Protection

S1 Table). Of those 27 genes, 6 also had direct evidence of Hap1p binding to their promoters [80] (Fig 4 and S1 Table), including *CTT1* and *GSH1* (though both *TSA2* and *SOD2* have indirect evidence of regulation by Hap1p [81, 82]).

We first focused on *CTT1*, since it is both necessary for NaCl-induced cross protection against H<sub>2</sub>O<sub>2</sub> in S288c [83], and sufficient to increase H<sub>2</sub>O<sub>2</sub> resistance when exogenously overexpressed in S288c [84]. We deleted *CTT1* in the YPS163 background, and found that ethanol-induced cross protection against H<sub>2</sub>O<sub>2</sub> was completely eliminated (Fig 5). The complete lack of cross protection in the *ctt1*Δ mutant suggests that other peroxidases cannot compensate for the lack of catalase activity under this condition. Next, because *CTT1* was part of the *HAP1* eQTL hotspot ([64], Fig 4c), we tested whether the S288c *HAP1* allele reduced *CTT1* expression during ethanol stress. To do this, we performed qPCR to measure *CTT1* mRNA induction following a 30-minute ethanol treatment. Consistent with our previous microarray data [45, 64], we saw lower induction of *CTT1* by ethanol in S288c relative to YPS163 (Fig 6a). Moreover, we saw dramatically reduced induction of *CTT1* in a YPS163 *hap1*Δ mutant compared to the wild-type YPS163 control (Fig 6a). Further support that *HAP1* is causative for reduced *CTT1* expression was provided by performing qPCR in the *HAP1* reciprocal hemizygotes, where we found that the S288c\_ *HAP1* allele resulted in significantly reduced *CTT1* induction compared to the YPS163\_ *HAP1* allele (Fig 6a).

To determine whether the differences in *CTT1* induction across strain backgrounds also manifested as differences in each strain's ability to detoxify H<sub>2</sub>O<sub>2</sub>, we measured *in vitro* peroxidase activity in cell-free extracts. We compared *in vitro* peroxidase activity in extracts from unstressed cells and cells exposed to ethanol stress for 60 minutes (i.e. the same pre-treatment time that induces acquired H<sub>2</sub>O<sub>2</sub> resistance (see Materials and Methods)). For wild-type YPS163, ethanol strongly induced peroxidase activity, and this induction was completely dependent upon *CTT1* (Fig 6b). Mirroring *CTT1* gene expression patterns, the induction of peroxidase activity was reduced in a YPS163 *hap1*Δ mutant. Additionally, reciprocal hemizyosity analysis provided further support that lack of *HAP1* function results in decreased peroxidase activity, as the hybrid containing the S288c\_ *HAP1* allele showed significantly reduced peroxidase activity following ethanol stress compared to the hybrid containing the YPS163\_ *HAP1* allele (Fig 6b). Notably, the hybrid containing the YPS163\_ *HAP1* allele had lower *CTT1* induction and *in vitro* peroxidase activity following ethanol shock than wild-type YPS163, despite equivalent levels of acquired H<sub>2</sub>O<sub>2</sub> resistance in the strains. These results suggest that *HAP1* may play additional roles in acquired H<sub>2</sub>O<sub>2</sub> resistance beyond H<sub>2</sub>O<sub>2</sub> detoxification, depending upon the genetic background (see Discussion). Interestingly, S288c showed no induction of peroxidase activity upon ethanol treatment, despite modest induction of the *CTT1* transcript. This result is reminiscent of Ctt1p regulation during heat shock in the S288c background, where mRNA levels increase without a concomitant increase in protein levels [83]. Thus, in addition to strain-specific differences in *CTT1* regulation at the RNA level, there are likely differences in regulation at the level of translation and/or protein stability.

## Discussion

In this study, we leveraged extensive natural variation in the yeast ethanol response to understand potential connections between gene expression variation and higher-order organismal traits. Because gene induction during stress is a poor predictor of a gene's requirement for basal stress survival [35, 37], we hypothesized that phenotypic variation in acquired stress resistance may be linked to gene expression variation. Our results provide a compelling case study in support of this notion—namely that a polymorphism in the *HAP1* transcription factor is causative for variation in acquired H<sub>2</sub>O<sub>2</sub> resistance, but not for the basal H<sub>2</sub>O<sub>2</sub> resistance of unstressed cells. Forward genetic screens have shown that the genes

## QTL Mapping of Yeast Cross Protection

necessary for basal and acquired resistance are largely non-overlapping [34, 36, 83], suggesting that mechanisms underlying basal and acquired stress resistance are distinct. That the YPS163 *hap1Δ* mutant was only affected for acquired H<sub>2</sub>O<sub>2</sub> resistance, but not the basal resistance of unstressed cells, strongly supports this model. Moreover, the YPS163 *hap1Δ* mutant was affected only when ethanol was the mild pretreatment, and was able to fully acquire H<sub>2</sub>O<sub>2</sub> resistance following mild H<sub>2</sub>O<sub>2</sub> or mild NaCl. These results suggest that the mechanisms underlying acquired resistance differ depending upon the mild stress that provokes the response. Further dissection of the mechanisms underlying acquired stress resistance will provide a more integrated view of eukaryotic stress biology.

Our results reveal a new role for Hap1p in cross protection against H<sub>2</sub>O<sub>2</sub> that has been lost in the S288c lab strain. We propose that a major mechanism underlying ethanol-induced cross protection against H<sub>2</sub>O<sub>2</sub> is the induction of cytosolic catalase T (Ctt1p), and that Hap1p is necessary for proper induction of *CTT1* during ethanol stress. We based this mechanism on the following observations. First, over-expression of *CTT1* in S288c is sufficient to induce high H<sub>2</sub>O<sub>2</sub> resistance [84]. Second, a YPS163 *ctt1Δ* mutant cannot acquire any further H<sub>2</sub>O<sub>2</sub> resistance following ethanol pre-treatment (Fig. 6), suggesting that no other antioxidant defenses are able to compensate under this condition. Lastly, the defect in cross protection for the YPS163 *hap1Δ* mutant correlates with reduced *CTT1* expression and peroxidase activity during ethanol stress (compare Figs 2 and 6). How Hap1p is involved in the regulation of *CTT1* during ethanol stress remains an open question, but we offer some possibilities. Hap1p is activated by heme, thus promoting transcription of genes involved in respiration, ergosterol biosynthesis, and oxidative stress defense including *CTT1* [74, 75, 77, 81]. Because heme biosynthesis requires oxygen, Hap1p is an indirect oxygen sensor and regulator of aerobically expressed genes [73, 74, 85]. There is currently no evidence that heme levels are affected by ethanol stress, nor is there evidence that Hap1p is “super-activating” under certain conditions. Thus, we disfavor a mechanism of direct induction by Hap1p. Instead, we favor a mechanism where Hap1p interacts with other transcription factors during ethanol stress to lead to full *CTT1* induction. One possibility that we favor is recruitment of the general stress transcription factor Msn2p, which plays a known role in acquired stress resistance [44, 45]. We previously showed that a YPS163 *msn2Δ* mutant had no induction of *CTT1* mRNA during ethanol stress [45], suggesting that Msn2p was an essential activator for *CTT1* under this condition. The *CTT1* promoter region contains three Msn2p DNA-binding sites, two of which are ~100-bp away from the Hap1p binding site. One possibility is that Hap1p binding to the *CTT1* promoter helps to recruit Msn2p during ethanol stress, possibly through chromatin remodeling that increases accessibility of the Msn2 binding sites as proposed by Elfving and colleagues [86].

What is the physiological role of Hap1p-dependent induction of *CTT1* during ethanol stress? One possibility is that regulation tied to the heme- and oxygen-sensing role of Hap1p ensures that *CTT1* induction only occurs under environmental conditions where reactive oxygen species (ROS) are most likely to be encountered—namely stressful conditions that are also aerobic. In the context of ethanol stress, aerobic fermentation would lead to subsequent respiration of the produced ethanol and simultaneous ROS production. Under these conditions, *CTT1* induction leading to ethanol-mediated cross protection against ROS would likely confer a fitness advantage. On the other hand, Ctt1p and other ROS-scavenging proteins are likely unnecessary during stressful, but anoxic conditions. Moreover, because heme production requires oxygen [73], reduced expression of non-essential heme containing proteins including Ctt1p is likely important for maintaining homeostasis [87]. Under these conditions, Hap1p would limit the induction of heme-containing oxidative stress defense proteins, thus helping to redirect limited heme to more critical protein targets. The S288c lab strain has long been known to possess a defective *HAP1* allele [78], either due to relaxation of selective constraint, or possibly due to positive selection for reduced ergosterol biosynthetic gene expression [88, 89]. Regardless, the loss of ethanol-induced acquired H<sub>2</sub>O<sub>2</sub> resistance is likely a secondary effect of

## QTL Mapping of Yeast Cross Protection

the loss of Hap1p function. Intriguingly, we did find that two (non-S88c) domesticated yeast strains also lack ethanol-induced cross protection against H<sub>2</sub>O<sub>2</sub> (S2 Fig), suggesting that phenotypic differences in acquired stress resistance may differentiate domesticated versus wild yeast. Because environmental stresses are likely encountered in combination or sequentially [90], acquired stress resistance is likely an important phenotype in certain natural ecological settings. Future studies directed at understanding differences in acquired stress resistance phenotypes in diverse wild yeast strains may provide unique insights into the ecology of yeast.

While our QTL mapping identified *HAP1* as the major effector of cross protection, we note that additional complexity remains unexplained. Notably, despite the strong cross protection defect in the YPS163 *hap1*Δ mutant, some residual cross protection persists that is absent in S288c (compare Figs 1 and 3). Intriguingly, the residual cross protection is also absent in the hybrid carrying the *S288c\_HAP1* allele, suggesting the involvement of other genes depending upon the genetic background (Fig 3). The lack of cross protection in S288c and the *S288c\_HAP1* hybrid correlates with the lack of inducible peroxidase activity following ethanol pretreatment in those strains. The lack of inducible peroxidase activity in S288c despite modest induction of *CTT1* mRNA could be due to translational regulation, as suggested by the observation that while mild heat shock induces *CTT1* mRNA, protein levels remain nearly undetectable [83]. Additionally, the observation that the hybrid carrying the *YPS163\_HAP1* allele still cross protects despite non-wild-type levels of *CTT1* mRNA induction and peroxidase activity and when compared to YPS163 also provides support that other genes and processes are involved in this complex trait. It is possible that that ROS damage repair is reduced and/or endogenous ROS production is higher in strains lacking *HAP1*, depending on the genetic background.

Gene expression variation is extensive in nature and is hypothesized to be a major driver of higher-order phenotypic variation. However, there are inherent challenges to connecting gene expression variation to higher-order organismal traits. Hundreds to thousands of genes are often differentially expressed across individuals, so identifying which particular transcripts exert effects on fitness is difficult. By studying acquired stress resistance—the phenotype most dependent on stress-activated gene expression changes—we were able to uncover a novel connection between gene expression variation and an organismal trait.

## Materials and Methods

### Strains and growth conditions

Strains and primers used in this study are listed in S2 and S3 Tables, respectively. The parental strains for QTL mapping were YPS163 (oak strain) and the S288c-derived DBY8268 (lab strain; referred to throughout the text as S288c). The construction of the S288c x YPS163 QTL mapping strain panel (44 F<sub>2</sub> progeny) is described in [91] (kindly provided by Justin Fay). Genotypes for the strain panel are listed in S4 Table. Deletions in the BY4741 (S288c) background were obtained from Open Biosystems (now GE Dharmacon), with the exception of *hap1* (whose construction is described in [45]). Deletions were moved into haploid *MATa* derivatives of DBY8268 (this study) and YPS163 [45] by homologous recombination with the deletion::KanMX cassette amplified from the appropriate yeast knockout strain [92]. Deletions were confirmed by diagnostic PCR (see S3 Table for primer sequences). Diploid strains for *HAP1* reciprocal hemizyosity analysis were generated as follows. The hemizygote containing the wild-type S288c *HAP1* allele (JL580) was generated by mating JL140 (YPS163 *MATa ho*Δ::HygMX *hap1*Δ::KanMX) to JL506 (DBY8268 *MATa ho ura3 hap1*). The hemizygote containing the wild-type YPS163 allele (JL581) was generated by mating JL112 (YPS163 *MATa ho*Δ::HygMX *HAP1*) to JL533 (DBY8268 *MATa ho ura3 hap1*Δ::KanMX). All strains were



## QTL Mapping of Yeast Cross Protection

grown in batch culture in YPD (1% yeast extract, 2% peptone, 2% dextrose) at 30°C with orbital shaking (270 rpm).

### Cross-protection assays

Cross-protection assays were performed as described in [44] with slight modifications. Briefly, 3-4 freshly streaked isolated colonies (<1 week old) were grown overnight to saturation, sub-cultured into 6 ml fresh media, and then grown for at least 8 generations (>12 h) to mid-exponential phase (OD<sub>600</sub> of 0.3 – 0.6) to reset any cellular memory of acquired stress resistance [84]. Each culture was split into two cultures and pretreated with YPD media containing either a single “primary” dose or the same concentration of water as a mock-pretreatment control. Primary doses consisted of 5% v/v ethanol, 0.4 M NaCl, or 0.4 mM H<sub>2</sub>O<sub>2</sub>. Thereafter, mock and primary-treated cells were handled identically. Following 1-hour pretreatment at 30°C with orbital shaking (270 rpm), cells were collected by mild centrifugation at 1,500 x *g* for 3 min. Pelleted cells were resuspended in fresh medium to an OD<sub>600</sub> of 0.6, then diluted 3-fold into a microtiter plate containing a panel of severe “secondary” H<sub>2</sub>O<sub>2</sub> doses ranging from 0.5 – 5.5 mM (0.5 mM increments; 150 µl total volume). Microtiter plates were sealed with air-permeable Rayon films (VWR), and cells were exposed to secondary stress for 2 hours at 30°C with 800 rpm shaking in a VWR® symphony™ Incubating Microplate Shaker. Four µl of a 50-fold dilution was spotted onto YPD agar plates and grown 48 h at 30°C. Viability at each dose was scored using a 4-point semi-quantitative scale to score survival compared to a no-secondary stress (YPD only) control: 100% = 3 pts, 50-90% = 2 pts, 10-50% = 1 pt, or 0% (3 or less colonies) = 0 pts. An overall H<sub>2</sub>O<sub>2</sub> tolerance score was calculated as the sum of scores over the 11 doses of secondary stress. Raw phenotypes for all acquired stress resistance assays can be found in S5 Table. A fully detailed acquired stress protocol has been deposited to protocols.io under doi [dx.doi.org/10.17504/protocols.io.g7sbzne](https://doi.org/10.17504/protocols.io.g7sbzne).

### QTL mapping

Phenotyping of the QTL mapping strain panel for basal and acquired H<sub>2</sub>O<sub>2</sub> resistance was performed in biological duplicate. Because cross-protection assays on the entire strain panel could not all be performed at the same time, we sought to minimize day-to-day variability. We found that minor differences in temperature and shaking speed affected H<sub>2</sub>O<sub>2</sub> resistance; as a result, we used a digital thermometer and tachometer to ensure standardization across experiments. Moreover, we found that differences in handling time were a critical determinant of experimental variability. To minimize this source of variability, all cell dilutions were performed quickly using multichannel pipettes, and no more than two microtiter plates were assayed during a single experiment. To ensure that replicates on a given day were reproducible, we always included the YPS163 wild-type parent as a reference.

Single mapping scans were performed using Haley-Knott regression [93] implemented through the R/QTL software package [94]. Genotype probabilities were estimated at every cM across the genome using the calc.genoprob function. Significant LOD scores were determined by 10,000 permutations that randomly shuffled phenotype data (i.e. strain labels) relative to the genotype data. The maximum LOD scores for the permuted scans were sorted, and the 99<sup>th</sup> percentile was used to set the genome-wide FDR at 1%. This resulted in LOD cutoffs of 3.21 for QTL mapping of basal H<sub>2</sub>O<sub>2</sub> resistance, and 4.05 for acquired H<sub>2</sub>O<sub>2</sub> resistance.

### Quantitative PCR of *CTT1* expression and cellular peroxidase assays

Induction of *CTT1* by ethanol was assessed by real-time quantitative PCR (qPCR) using the Maxima SYBR q-PCR Master Mix (Thermo Fisher Scientific) and a Bio-Rad CFX96 Touch™ Real-Time PCR Detection System, according to the manufacturers' instructions. Cells were grown to mid-exponential phase (OD<sub>600</sub> of 0.3 – 0.6) as described for the cross-protection assays. Cells were collected by centrifugation at 1,500 x *g* for 3 minutes immediately prior to the

## QTL Mapping of Yeast Cross Protection

addition of 5% v/v ethanol (unstressed sample) and 30 minutes post-ethanol treatment, which encompasses the peak of global expression changes to acute ethanol stress [45]. Cell pellets were flash frozen in liquid nitrogen and stored at  $-80^{\circ}\text{C}$  until processing. Total RNA was recovered by hot phenol extraction as previously described [95], and then purified with a Quick-RNA™ MiniPrep Plus Kit (Zymo Research) including on-column DNase I treatment. cDNA synthesis was performed as described [95], using 10  $\mu\text{g}$  total RNA, 3  $\mu\text{g}$  anchored oligo-dT (T20VN), and SuperScript III (Thermo Fisher Scientific). One ng cDNA was used as template for qPCR with the following parameters: initial denaturation at  $95^{\circ}\text{C}$  for 3 minutes followed by 40 cycles of  $95^{\circ}\text{C}$  for 15 seconds and  $55^{\circ}\text{C}$  annealing and elongation for 1 minute. Cq was determined using regression analysis, with baseline subtraction via curve fit. The presence of a single amplicon for each reaction was validated by melt curve analysis. The average of two technical replicates were used to determine relative *CTT1* mRNA abundance via the  $\Delta\Delta\text{Cq}$  method [96], by normalizing to an internal control gene (*ERV25*) whose expression is unaffected by ethanol stress and does not vary in expression between S288c and YPS163 [45]. Primers for *CTT1* and *ERV25* were designed to span  $\sim 200$  bp in the 3' region of each ORF (to decrease the likelihood of artifacts due to premature termination during cDNA synthesis), and for gene regions free of polymorphisms between S288c and YPS163 (see S3 Table for primer sequences). Three biological replicates were performed and statistical significance was assessed via a paired *t*-test using Prism 7 (GraphPad Software).

For peroxidase activity assays, mid-exponential phase cells were collected immediately prior to and 60 minutes post-ethanol treatment, to assess peroxidase activity levels during the induction of cross protection. Cells were collected by centrifugation at  $1,500 \times g$  for 3 minutes, washed twice in 50 mM potassium phosphate buffer, pH 7.0 ( $\text{KP}_i$ ), flash frozen in liquid nitrogen, and then stored at  $-80^{\circ}\text{C}$  until processed. For preparation of whole cell extracts, cells were thawed on ice, resuspended in 1 ml  $\text{KP}_i$  buffer, and then transferred to 2-ml screw-cap tubes for bead beating. An equal volume (1 ml) of acid-washed glass beads (425 - 600 micron, Sigma-Aldrich) was added to each tube. Cells were lysed by four 30-second cycles of bead beating in a BioSpec Mini-Beadbeater-24 (3,500 oscillations/minute, 2 minutes on ice between cycles). Cellular debris was removed by centrifugation at  $21,000 \times g$  for 30 minutes at  $4^{\circ}\text{C}$ . The protein concentration of each lysate was measured by Bradford assay (Bio-Rad) using bovine serum albumin (BSA) as a standard [97]. Peroxidase activity in cellular lysates was monitored as described [98], with slight modifications. Briefly, 50  $\mu\text{g}$  of cell free extract was added to 1 ml of 15 mM  $\text{H}_2\text{O}_2$  in  $\text{KP}_i$  buffer.  $\text{H}_2\text{O}_2$  decomposition was monitored continuously for 10 minutes in Quartz cuvettes (Starna Cells, Inc.) at 240 nm ( $\epsilon_{240} = 43.6 \text{ M}^{-2} \text{ cm}^{-1}$ ) using a SpectraMax Plus Spectrophotometer (Molecular Devices). One unit of catalase activity catalyzed the decomposition of 1  $\mu\text{mol}$  of  $\text{H}_2\text{O}_2$  per minute. For each sample, results represent the average of technical duplicates. To assess statistical significance, four biological replicates were performed and significance was assessed via a paired *t*-test using Prism 7 (GraphPad Software).

## Acknowledgements

We thank Audrey Gasch and Justin Fay for strains, Andy Alverson and Christian Tipsmark for the use of their equipment, and members of the Lewis lab for helpful conversations. This material is based upon work supported by National Science Foundation Grant No. IOS-1656602 (JAL), startup funds provided by the University of Arkansas (JAL), the Arkansas Biosciences Institute (Arkansas Settlement Proceeds Act of 2000) (JAL), and a Research Assistantship provided through the University of Arkansas Cell and Molecular Biology Graduate Program (ANS). The funders had no role in study design, data collection and analysis, decision to publish, or preparation of the manuscript.

## QTL Mapping of Yeast Cross Protection

### Figures

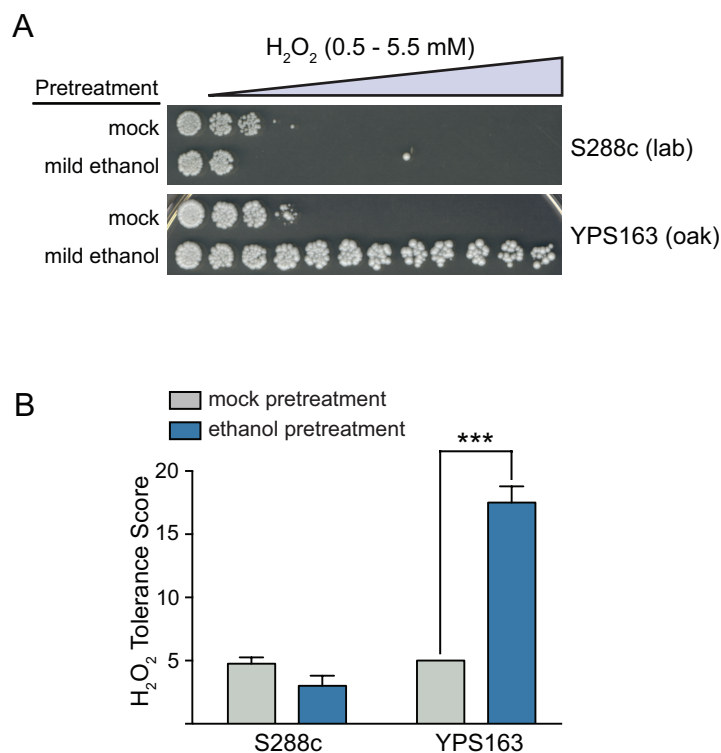

**Figure 1. Natural variation in ethanol-induced cross protection against H<sub>2</sub>O<sub>2</sub>.** (A) A representative acquired H<sub>2</sub>O<sub>2</sub> resistance assay is shown. S288c (lab strain) and YPS163 (wild oak strain) were exposed to 5% ethanol or mock (5% water) pretreatment for 60 min, washed, exposed to 11 doses of severe H<sub>2</sub>O<sub>2</sub> for 2 hr, and then plated to score viability. (B) A single survival score was calculated from the viability at all H<sub>2</sub>O<sub>2</sub> doses (see Materials and Methods). Each plot shows the mean and standard deviation of 4 independent biological replicates. Asterisks represent resistance that was significantly different from mock-treated cells (\*\*\*)  $P < 0.001$ ,  $t$ -test).

## QTL Mapping of Yeast Cross Protection

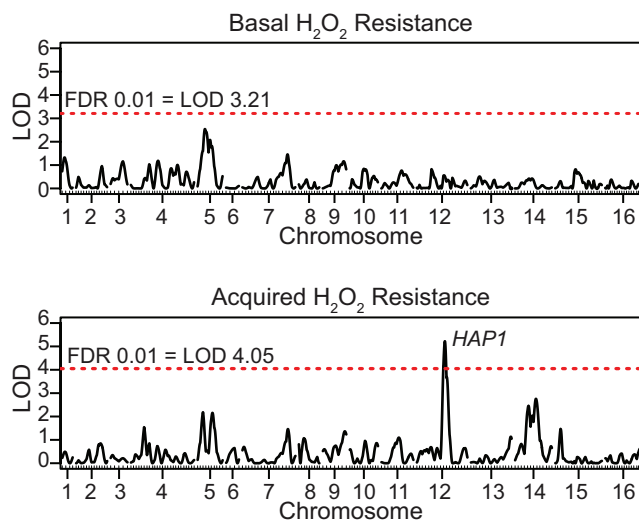

**Figure 2. The genetic basis of natural variation for basal and acquired stress resistance is distinct.** Linkage mapping of the S288c x YPS163 cross identified no significant QTLs for basal H<sub>2</sub>O<sub>2</sub> resistance (top panel), but did identify a major QTL on chromosome XII for ethanol-induced cross protection against H<sub>2</sub>O<sub>2</sub> (bottom panel). *HAP1* falls within the 1.5-LOD support interval for the chromosome XII peak. The red horizontal line denotes the LOD threshold for significance (1% FDR).

## QTL Mapping of Yeast Cross Protection

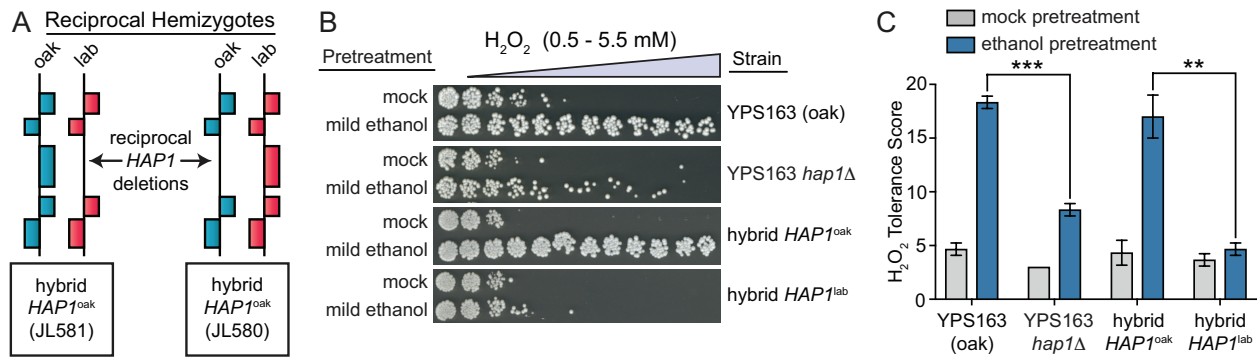

**Figure 3. Ethanol-induced cross protection against  $H_2O_2$  requires  $HAP1$ .** (A) Schematic of reciprocal hemizygosity analysis. Each block represents a gene, and each hybrid strain contains a single-copy deletion of  $hap1$ , and a single copy of either the  $S288c\_HAP1$  or  $YPS163\_HAP1$  allele. (B) Representative acquired  $H_2O_2$  resistance assays for wild-type YPS163, the YPS163  $hap1\Delta$  mutant, and the reciprocal hemizygotes. (C) Each survival score plot shows the mean and standard deviation of biological triplicates. Asterisks represent significant differences in acquired resistance between denoted strains (\*\*  $P < 0.01$ , \*\*\*  $P < 0.001$ ,  $t$ -test).

## QTL Mapping of Yeast Cross Protection

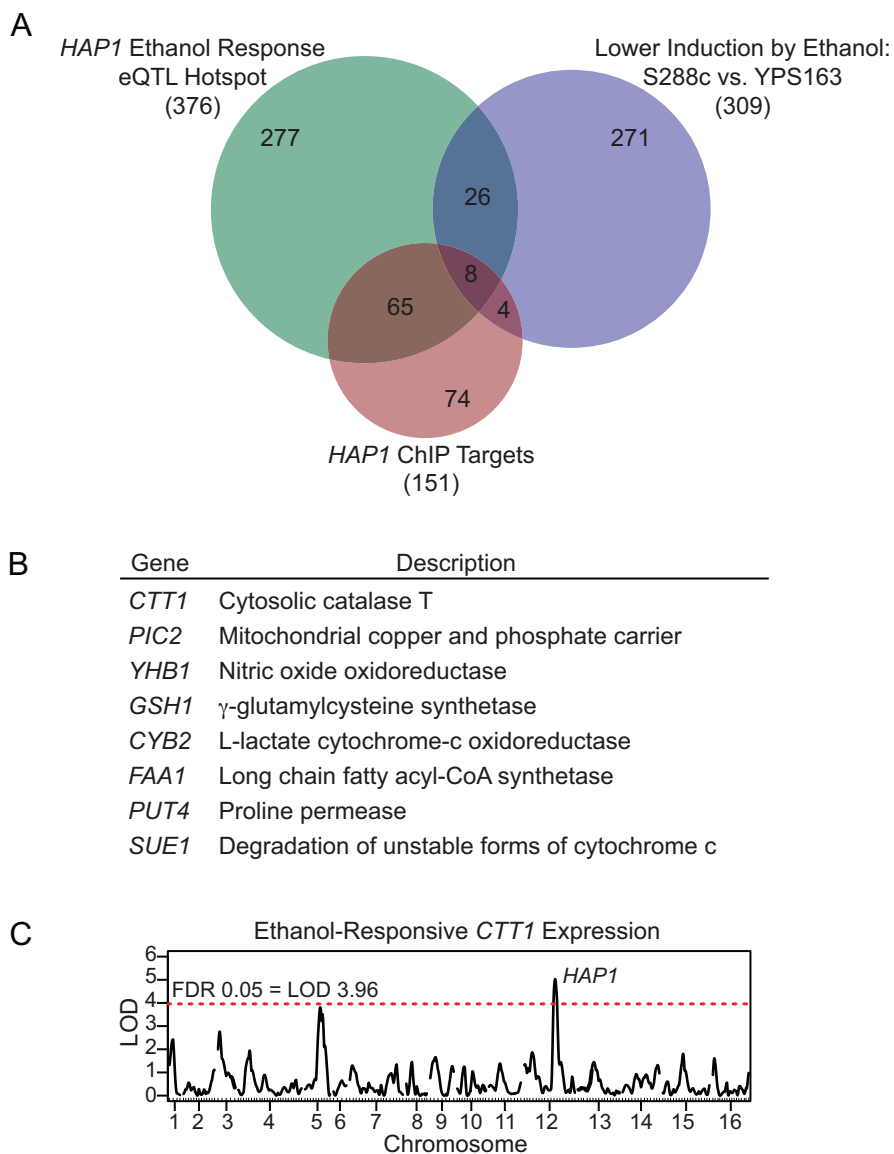

**Figure 4. Expression variation in Hap1p regulatory targets implicates oxidative stress defense genes as the direct effectors of ethanol-induced cross protection against H<sub>2</sub>O<sub>2</sub>.**

(A) Overlap between genes that were *HAP1* eQTL hotspot targets from [64], genes with defective induction in S288c vs. YPS163 from [64], and direct targets of *HAP1* identified via ChIP experiments compiled from [80]. (B) Descriptions of the eight genes that overlapped for all three criteria. (C) Previous eQTL mapping of the yeast ethanol response [64] implicated *HAP1* as causative for natural variation in *CTT1* induction levels during ethanol stress.

## QTL Mapping of Yeast Cross Protection

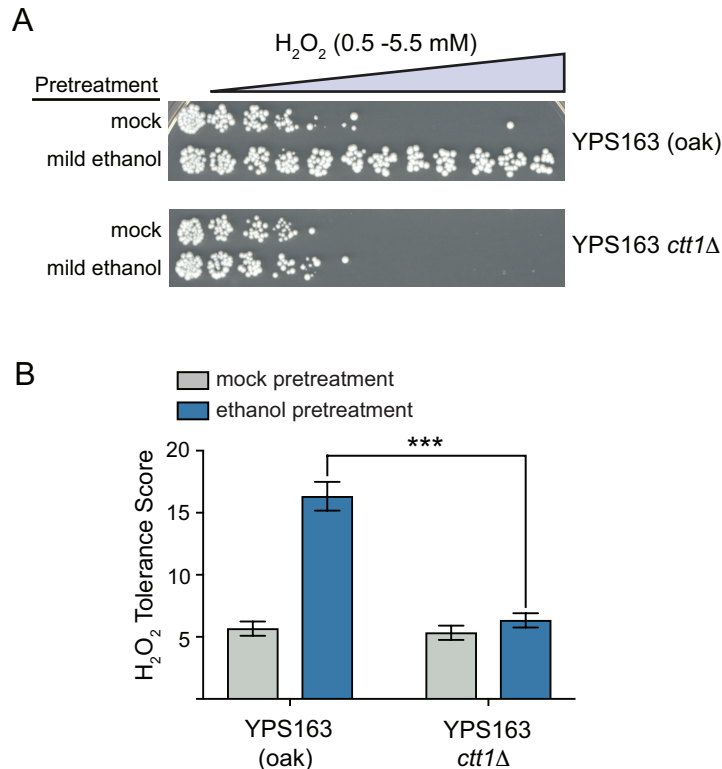

**Figure 5. *CTT1* function is necessary for ethanol-induced cross protection against H<sub>2</sub>O<sub>2</sub>.** (A) Representative acquired H<sub>2</sub>O<sub>2</sub> resistance assays for wild-type YPS163 and the YPS163 *hap1*Δ mutant. (B) Survival score plots indicating the mean and standard deviation of biological triplicates. Asterisks represent significant differences in acquired resistance between denoted strains (\*\**P* < 0.001, *t*-test).

## QTL Mapping of Yeast Cross Protection

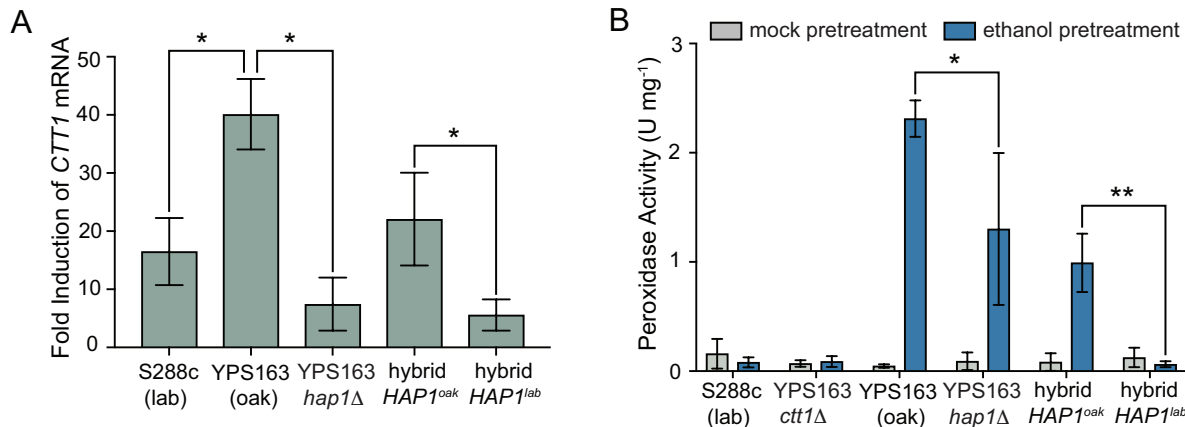

**Figure 6. *HAP1* is required for full induction of *CTT1* gene expression and cellular peroxidase activity during ethanol stress.**

(A) Fold induction of *CTT1* mRNA in indicated strains following 30 min ethanol stress compared to unstressed cells, assessed by qPCR. (B) Peroxidase activity measured in cell-free extracts in either mock treated or ethanol-stressed cells. Asterisks represent significant differences in *CTT1* mRNA induction or peroxidase activity between denoted strains (\*  $P < 0.05$ , \*\*  $P < 0.01$ , paired  $t$ -test).



## QTL Mapping of Yeast Cross Protection

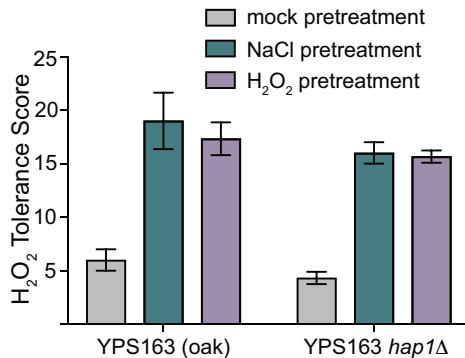

**Figure S1. *HAP1* is not required for acquired H<sub>2</sub>O<sub>2</sub> resistance following mild H<sub>2</sub>O<sub>2</sub> or mild NaCl pretreatments.** Cultures of wild-type YPS163 and the YPS163 *hap1*Δ mutant were split and exposed to either 0.4 mM H<sub>2</sub>O<sub>2</sub>, 0.4 M NaCl, or a mock (media only) treatment for 60 min, washed, exposed to 11 doses of severe H<sub>2</sub>O<sub>2</sub> for 2 hr, and then plated to score viability. The survival scores across each of the 11 doses are plotted as the mean and standard deviation of biological triplicates.

## QTL Mapping of Yeast Cross Protection

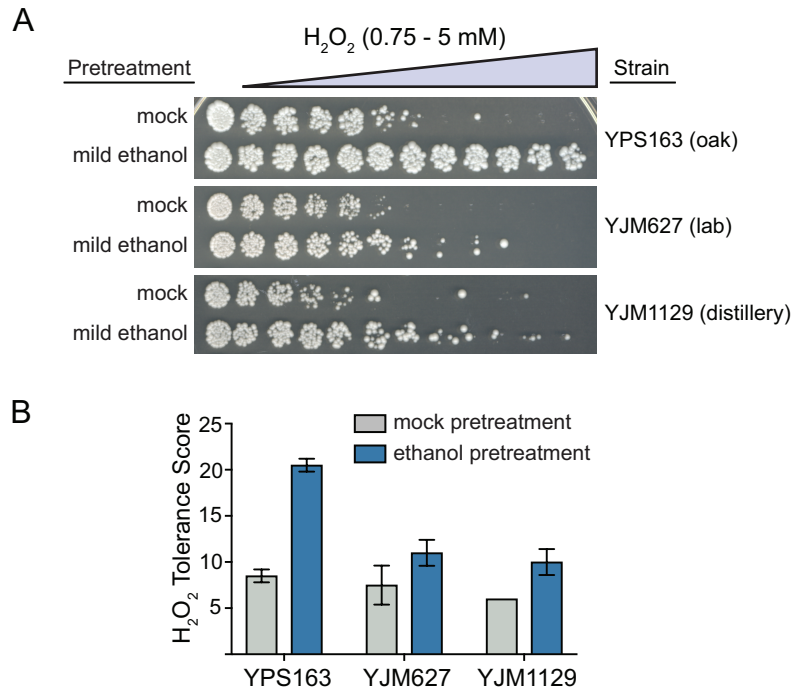

**Figure S2. Other non-S288c-derived yeast isolates lack ethanol-induced cross protection against H<sub>2</sub>O<sub>2</sub>.** Cultures of wild-type YPS163 and the YPS163 *hap1*Δ mutant were split and exposed to either 0.4 mM H<sub>2</sub>O<sub>2</sub>, 0.4 M NaCl, or a mock (media only) treatment for 60 min, washed, exposed to 11 doses of severe H<sub>2</sub>O<sub>2</sub> (0.25 – 5 mM) for 2 hr, and then plated to score viability. The survival scores across each of the 11 doses are plotted as the mean and standard deviation of biological triplicates.

## Supporting information

**Table S1. Overlap between genes that are part of the *HAP1* eQTL hotspot, have defective induction by ethanol in S288c vs. YPS163, and are ChIP targets of Hap1p.**

**Table S2. Strains used in this study.**

**Table S3. Primers used in this study.**

**Table S4. Genotypes for S288c x YPS163 QTL mapping strain panel.**

**Table S5. Raw data used to generate each figure.**

## References

1. King MC, Wilson AC. Evolution at two levels in humans and chimpanzees. *Science*. 1975;188(4184):107-116. doi: 10.1126/science.1090005 PMID: 1090005
2. Enard W, Khaitovich P, Klose J, Zollner S, Heissig F, Giavalisco P, et al. Intra- and interspecific variation in primate gene expression patterns. *Science*. 2002;296(5566):340-343. doi: 10.1126/science.1068996 PMID: 11951044
3. Schaub MA, Boyle AP, Kundaje A, Batzoglou S, Snyder M. Linking disease associations with regulatory information in the human genome. *Genome Res*. 2012;22(9):1748-1759. doi: 10.1101/gr.136127.111 PMID: 22955986
4. Maurano MT, Humbert R, Rynes E, Thurman RE, Haugen E, Wang H, et al. Systematic localization of common disease-associated variation in regulatory DNA. *Science*. 2012;337(6099):1190-1195. doi: 10.1126/science.1222794 PMID: 22955828
5. Nica AC, Montgomery SB, Dimas AS, Stranger BE, Beazley C, Barroso I, et al. Candidate causal regulatory effects by integration of expression QTLs with complex trait genetic associations. *PLoS Genet*. 2010;6(4):e1000895. doi: 10.1371/journal.pgen.1000895 PMID: 20369022
6. Zhang F, Lupski JR. Non-coding genetic variants in human disease. *Human Molecular Genetics*. 2015;24(R1):R102-R110. doi: 10.1093/hmg/ddv259 PMID: 26152199
7. Li MJ, Wang P, Liu X, Lim EL, Wang Z, Yeager M, et al. GWASdb: a database for human genetic variants identified by genome-wide association studies. *Nucleic Acids Research*. 2012;40(D1):D1047-D1054. doi: 10.1093/nar/gkr1182 PMID: 22139925
8. Hindorff LA, Sethupathy P, Junkins HA, Ramos EM, Mehta JP, Collins FS, et al. Potential etiologic and functional implications of genome-wide association loci for human diseases and traits. *Proc Natl Acad Sci U S A*. 2009;106(23):9362-9367. doi: 10.1073/pnas.0903103106 PMID: 19474294
9. Oleksiak MF, Churchill GA, Crawford DL. Variation in gene expression within and among natural populations. *Nat Genet*. 2002;32(2):261-266. doi: 10.1038/ng983 PMID: 12219088
10. Ferea TL, Botstein D, Brown PO, Rosenzweig RF. Systematic changes in gene expression patterns following adaptive evolution in yeast. *Proc Natl Acad Sci U S A*. 1999;96(17):9721-9726. doi: 10.1073/pnas.96.17.9721 PMID: 10449761
11. Crawford DL, Powers DA. Molecular basis of evolutionary adaptation at the lactate dehydrogenase-B locus in the fish *Fundulus heteroclitus*. *Proc Natl Acad Sci U S A*. 1989;86(23):9365-9369. doi: 10.1073/pnas.86.23.9365 PMID: 2594773

## QTL Mapping of Yeast Cross Protection

12. Krebs RA, Feder ME. Natural Variation in the Expression of the Heat-Shock Protein HSP70 in a Population of *Drosophila melanogaster* and Its Correlation with Tolerance of Ecologically Relevant Thermal Stress. *Evolution*. 1997;51(1):173. doi: 10.2307/2410970 PMID: 28568793
13. Fay JC, McCullough HL, Sniegowski PD, Eisen MB. Population genetic variation in gene expression is associated with phenotypic variation in *Saccharomyces cerevisiae*. *Genome Biol*. 2004;5(R26). doi: 10.1186/gb-2004-5-4-r26 PMID: 15059259
14. Wen G, Mahata SK, Cadman P, Mahata M, Ghosh S, Mahapatra NR, et al. Both rare and common polymorphisms contribute functional variation at CHGA, a regulator of catecholamine physiology. *Am J Hum Genet*. 2004;74(2):197-207. doi: 10.1086/381399 PMID: 14740315
15. MacLaren EJ, Sikela JM. Cerebellar Gene Expression Profiling and eQTL Analysis in Inbred Mouse Strains Selected for Ethanol Sensitivity. *Alcoholism: Clinical and Experimental Research*. 2005;29(9):1568-1579. doi: 10.1097/01.alc.0000179376.27331.ac PMID: 16205357
16. Nogami S, Ohya Y, Yvert G. Genetic complexity and quantitative trait loci mapping of yeast morphological traits. *PLoS Genet*. 2007;3(2):e31. doi: 10.1371/journal.pgen.0030031 PMID: 17319748
17. Sicard A, Thamm A, Marona C, Lee YW, Wahl V, Stinchcombe JR, et al. Repeated evolutionary changes of leaf morphology caused by mutations to a homeobox gene. *Curr Biol*. 2014;24(16):1880-1886. doi: 10.1016/j.cub.2014.06.061 PMID: 25127212
18. Chapman MA, Hiscock SJ, Filatov DA. The genomic bases of morphological divergence and reproductive isolation driven by ecological speciation in *Senecio* (Asteraceae). *Journal of Evolutionary Biology*. 2016;29(1):98-113. doi: 10.1111/jeb.12765 PMID: 26414668
19. Ranjan A, Budke JM, Rowland SD, Chitwood DH, Kumar R, Carriedo L, et al. eQTL Regulating Transcript Levels Associated with Diverse Biological Processes in Tomato. *Plant Physiol*. 2016;172(1):328-340. doi: 10.1104/pp.16.00289 PMID: 27418589
20. Boell L, Pallares LF, Brodski C, Chen Y, Christian JL, Kousa YA, et al. Exploring the effects of gene dosage on mandible shape in mice as a model for studying the genetic basis of natural variation. *Dev Genes Evol*. 2013;223(5):279-87. doi: 10.1007/s00427-013-0443-y PMID: 23563729
21. Indjeian Vahan B, Kingman Garrett A, Jones Felicity C, Guenther Catherine A, Grimwood J, Schmutz J, et al. Evolving New Skeletal Traits by *cis*-Regulatory Changes in Bone Morphogenetic Proteins. *Cell*. 2016;164(1-2):45-56. doi: 10.1016/j.cell.2015.12.007 PMID: 26774823
22. McGregor AP, Orgogozo V, Delon I, Zanet J, Srinivasan DG, Payre F, et al. Morphological evolution through multiple *cis*-regulatory mutations at a single gene. *Nature*. 2007;448(7153):587-590. doi: 10.1038/nature05988 PMID: 17632547
23. Abzhanov A, Protas M, Grant BR, Grant PR, Tabin CJ. Bmp4 and morphological variation of beaks in Darwin's finches. *Science*. 2004;305(5689):1462-5. doi: 10.1126/science.1098095 PMID: 15353802
24. Ziebarth JD, Cook MN, Wang X, Williams RW, Lu L, Cui Y. Treatment- and population-dependent activity patterns of behavioral and expression QTLs. *PLoS One*. 2012;7(2):e31805. doi: 10.1371/journal.pone.0031805 PMID: 22359631
25. Whitfield CW, Cziko AM, Robinson GE. Gene Expression Profiles in the Brain Predict Behavior in Individual Honey Bees. *Science*. 2003;302(5643):296-299. doi: 10.1126/science.1086807 PMID: 14551438
26. Wang J, Ross KG, Keller L. Genome-wide expression patterns and the genetic architecture of a fundamental social trait. *PLoS Genet*. 2008;4(7):e1000127. doi: 10.1371/journal.pgen.1000127 PMID: 18636101

## QTL Mapping of Yeast Cross Protection

27. Chesler EJ, Lu L, Shou S, Qu Y, Gu J, Wang J, et al. Complex trait analysis of gene expression uncovers polygenic and pleiotropic networks that modulate nervous system function. *Nature Genetics*. 2005;37(3):233-242. doi: 10.1038/ng1518 PMID: 15711545
28. Khaitovich P, Paabo S, Weiss G. Toward a neutral evolutionary model of gene expression. *Genetics*. 2005;170(2):929-939. doi: 10.1534/genetics.104.037135 PMID: 15834146
29. Helantera H, Uller T. Neutral and adaptive explanations for an association between caste-biased gene expression and rate of sequence evolution. *Front Genet*. 2014;5(297). doi: 10.3389/fgene.2014.00297 PMID: 25221570
30. Yang JR, Maclean CJ, Park C, Zhao H, Zhang J. Intra- and inter-specific variations of gene expression levels in yeast are largely neutral. *Mol Biol Evol*. 2017;doi: 10.1093/molbev/msx171 PMID: 28575451
31. Gagneur J, Stegle O, Zhu C, Jakob P, Tekkedil MM, Aiyar RS, et al. Genotype-environment interactions reveal causal pathways that mediate genetic effects on phenotype. *PLoS Genet*. 2013;9(e1003803). doi: 10.1371/journal.pgen.1003803 PMID: 24068968
32. Grundberg E, Small KS, Hedman AK, Nica AC, Buil A, Keildson S, et al. Mapping *cis*- and *trans*-regulatory effects across multiple tissues in twins. *Nat Genet*. 2012;44(10):1084-1089. doi: 10.1038/ng.2394 PMID: 22941192
33. Hauberg ME, Zhang W, Giambartolomei C, Franzen O, Morris DL, Vyse TJ, et al. Large-Scale Identification of Common Trait and Disease Variants Affecting Gene Expression. *Am J Hum Genet*. 2017;100(6):885-894. doi: 10.1016/j.ajhg.2017.04.016 PMID: 28552197
34. Gibney PA, Lu C, Caudy AA, Hess DC, Botstein D. Yeast metabolic and signaling genes are required for heat-shock survival and have little overlap with the heat-induced genes. *Proc Natl Acad Sci U S A*. 2013;110(46):E4393-402. doi: 10.1073/pnas.1318100110 PMID: 24167267
35. Warringer J, Ericson E, Fernandez L, Nerman O, Blomberg A. High-resolution yeast phenomics resolves different physiological features in the saline response. *Proc Natl Acad Sci U S A*. 2003;100(26):15724-15729. doi: 10.1073/pnas.2435976100 PMID: 14676322
36. Jarolim S, Ayer A, Pillay B, Gee AC, Phrakaysone A, Perrone GG, et al. *Saccharomyces cerevisiae* genes involved in survival of heat shock. *G3 (Bethesda)*. 2013;3(12):2321-2333. doi: 10.1534/g3.113.007971 PMID: 24142923
37. Giaever G, Chu AM, Ni L, Connelly C, Riles L, Veronneau S, et al. Functional profiling of the *Saccharomyces cerevisiae* genome. *Nature*. 2002;418(6896):387-391. doi: 10.1038/nature00935 PMID: 12140549
38. Birrell GW, Brown JA, Wu HI, Giaever G, Chu AM, Davis RW, et al. Transcriptional response of *Saccharomyces cerevisiae* to DNA-damaging agents does not identify the genes that protect against these agents. *Proc Natl Acad Sci U S A*. 2002;99(13):8778-8783. doi: 10.1073/pnas.132275199 PMID: 12077312
39. van Voorst F, Houghton-Larsen J, Jonson L, Kielland-Brandt MC, Brandt A. Genome-wide identification of genes required for growth of *Saccharomyces cerevisiae* under ethanol stress. *Yeast*. 2006;23(351-359). doi: PMID: 16598687
40. Teixeira MC, Raposo LR, Mira NP, Lourenco AB, Sa-Correia I. Genome-wide identification of *Saccharomyces cerevisiae* genes required for maximal tolerance to ethanol. *Appl. Environ. Microbiol*. 2009;75(5761-5772). doi: PMID: 19633105
41. Yoshikawa K, Tanaka T, Furusawa C, Nagahisa K, Hirasawa T, Shimizu H. Comprehensive phenotypic analysis for identification of genes affecting growth under ethanol stress in *Saccharomyces cerevisiae*. *FEMS Yeast Res*. 2009;9(32-44). doi: 10.1111/j.1567-1364.2008.00456.x PMID: 19054128

## QTL Mapping of Yeast Cross Protection

42. Kubota S, Takeo I, Kume K, Kanai M, Shitamukai A, Mizunuma M, et al. Effect of ethanol on cell growth of budding yeast: genes that are important for cell growth in the presence of ethanol. *Biosci. Biotechnol. Biochem.* 2004;68(968-972. doi: PMID: 15118337
43. Fujita K, Matsuyama A, Kobayashi Y, Iwahashi H. The genome-wide screening of yeast deletion mutants to identify the genes required for tolerance to ethanol and other alcohols. *FEMS Yeast Res.* 2006;6(744-750. doi: PMID: 16879425
44. Berry DB, Gasch AP. Stress-activated genomic expression changes serve a preparative role for impending stress in yeast. *Mol Biol Cell.* 2008;19(11):4580-4587. doi: 10.1091/mbc.E07-07-0680 PMID: 18753408
45. Lewis JA, Elkon IM, McGee MA, Higbee AJ, Gasch AP. Exploiting natural variation in *Saccharomyces cerevisiae* to identify genes for increased ethanol resistance. *Genetics.* 2010;186(4):1197-1205. doi: 10.1534/genetics.110.121871 PMID: 20855568
46. Trent JD, Gabrielsen M, Jensen B, Neuhard J, Olsen J. Acquired thermotolerance and heat shock proteins in thermophiles from the three phylogenetic domains. *J Bacteriol.* 1994;176(19):6148-6152. doi: 10.1128/jb.176.19.6148-6152.1994 PMID: 7928981
47. Collinson LP, Dawes IW. Inducibility of the response of yeast cells to peroxide stress. *J Gen Microbiol.* 1992;138(2):329-335. doi: 10.1099/00221287-138-2-329 PMID: 1564443
48. Dahlggaard J, Loeschcke V, Michalak P, Justesen J. Induced thermotolerance and associated expression of the heat-shock protein Hsp70 in adult *Drosophila melanogaster*. *Funct Ecol.* 1998;12(5):786-793. doi: 10.1046/j.1365-2435.1998.00246.x PMID:
49. Raffaghello L, Lee C, Safdie FM, Wei M, Madia F, Bianchi G, et al. Starvation-dependent differential stress resistance protects normal but not cancer cells against high-dose chemotherapy. *Proc Natl Acad Sci U S A.* 2008;105(8215-8220. doi: PMID: 18378900
50. Hong SW, Vierling E. Mutants of *Arabidopsis thaliana* defective in the acquisition of tolerance to high temperature stress. *Proc Natl Acad Sci U S A.* 2000;97(8):4392-4397. doi: 10.1073/pnas.97.8.4392 PMID: 10760305
51. Ali ZA, Callaghan CJ, Lim E, Ali AA, Nouraei SA, Akthar AM, et al. Remote ischemic preconditioning reduces myocardial and renal injury after elective abdominal aortic aneurysm repair: a randomized controlled trial. *Circulation.* 2007;116(11 Suppl):I98-105. doi: 10.1161/circulationaha.106.679167 PMID: 17846333
52. Cheung MM, Kharbada RK, Konstantinov IE, Shimizu M, Frndova H, Li J, et al. Randomized controlled trial of the effects of remote ischemic preconditioning on children undergoing cardiac surgery: first clinical application in humans. *J Am Coll Cardiol.* 2006;47(11):2277-2282. doi: 10.1016/j.jacc.2006.01.066 PMID: 16750696
53. Hausenloy DJ, Mwamure PK, Venugopal V, Harris J, Barnard M, Grundy E, et al. Effect of remote ischaemic preconditioning on myocardial injury in patients undergoing coronary artery bypass graft surgery: a randomised controlled trial. *Lancet.* 2007;370(9587):575-579. doi: 10.1016/S0140-6736(07)61296-3 PMID: 17707752
54. Thielmann M, Kottenberg E, Kleinbongard P, Wendt D, Gedik N, Pasa S, et al. Cardioprotective and prognostic effects of remote ischaemic preconditioning in patients undergoing coronary artery bypass surgery: a single-centre randomised, double-blind, controlled trial. *Lancet.* 2013;382(9892):597-604. doi: 10.1016/S0140-6736(13)61450-6 PMID: 23953384
55. Wegener S, Gottschalk B, Jovanovic V, Knab R, Fiebach JB, Schellinger PD, et al. Transient ischemic attacks before ischemic stroke: preconditioning the human brain? A multicenter magnetic resonance imaging study. *Stroke.* 2004;35(3):616-621. doi: 10.1161/01.STR.0000115767.17923.6A PMID: 14963288

## QTL Mapping of Yeast Cross Protection

56. Huang HL, Wang N, Zhou H, Yu CY. Study on influence of transient ischemic attack on subsequent cerebral infarction. *Eur Rev Med Pharmacol Sci*. 2016;20(24):5164-5167. doi: PMID: 28051252
57. Moncayo J, de Freitas GR, Bogousslavsky J, Altieri M, van Melle G. Do transient ischemic attacks have a neuroprotective effect? *Neurology*. 2000;54(11):2089-94. doi: PMID: 10851368
58. Piskur J, Rozpedowska E, Polakova S, Merico A, Compagno C. How did *Saccharomyces* evolve to become a good brewer? *Trends Genet*. 2006;22(4):183-6. doi: 10.1016/j.tig.2006.02.002 PMID: 16499989
59. Chandler M, Stanley GA, Rodgers P, Chambers P. A genomic approach to defining the ethanol stress response in the yeast *Saccharomyces cerevisiae*. *Ann Microbiol*. 2004;54(4):427-545. doi: PMID:
60. Fujita K, Matsuyama A, Kobayashi Y, Iwahashi H. Comprehensive gene expression analysis of the response to straight-chain alcohols in *Saccharomyces cerevisiae* using cDNA microarray. *J Appl Microbiol*. 2004;97(57-67). doi: PMID: 15186442
61. Hirasawa T, Yoshikawa K, Nakakura Y, Nagahisa K, Furusawa C, Katakura Y, et al. Identification of target genes conferring ethanol stress tolerance to *Saccharomyces cerevisiae* based on DNA microarray data analysis. *J Biotechnol*. 2007;131(34-44). doi: PMID: 17604866
62. Piper PW, Talreja K, Panaretou B, Moradas-Ferreira P, Byrne K, Praekelt UM, et al. Induction of major heat-shock proteins of *Saccharomyces cerevisiae*, including plasma membrane Hsp30, by ethanol levels above a critical threshold. *Microbiology*. 1994;140 ( Pt 11)(3031-3038. doi: PMID: 7812443
63. Alexandre H, Ansanay-Galeote V, Dequin S, Blondin B. Global gene expression during short-term ethanol stress in *Saccharomyces cerevisiae*. *FEBS Lett*. 2001;498(1):98-103. doi: PMID: 11389906
64. Lewis JA, Broman AT, Will J, Gasch AP. Genetic architecture of ethanol-responsive transcriptome variation in *Saccharomyces cerevisiae* strains. *Genetics*. 2014;198(1):369-382. doi: 10.1534/genetics.114.167429 PMID: 24970865
65. Semchyshyn HM. Hormetic concentrations of hydrogen peroxide but not ethanol induce cross-adaptation to different stresses in budding yeast. *Int J Microbiol*. 2014;2014(485792). doi: 10.1155/2014/485792 PMID: 24669223
66. Cadenas E, Boveris A, Ragan CI, Stoppani AO. Production of superoxide radicals and hydrogen peroxide by NADH-ubiquinone reductase and ubiquinol-cytochrome c reductase from beef-heart mitochondria. *Arch Biochem Biophys*. 1977;180(2):248-257. doi: PMID: 195520
67. Drakulic T, Temple MD, Guido R, Jarolim S, Breitenbach M, Attfeld PV, et al. Involvement of oxidative stress response genes in redox homeostasis, the level of reactive oxygen species, and ageing in *Saccharomyces cerevisiae*. *FEMS Yeast Res*. 2005;5(12):1215-1228. doi: 10.1016/j.femsyr.2005.06.001 PMID: 16087409
68. Pérez-Gallardo RV, Briones LS, Díaz-Pérez AL, Gutiérrez S, Rodríguez-Zavala JS, Campos-García J. Reactive oxygen species production induced by ethanol in *Saccharomyces cerevisiae* increases because of a dysfunctional mitochondrial iron-sulfur cluster assembly system. *FEMS Yeast Research*. 2013;13(8):804-819. doi: 10.1111/1567-1364.12090 PMID:
69. Ehrenreich IM, Bloom J, Torabi N, Wang X, Jia Y, Kruglyak L. Genetic architecture of highly complex chemical resistance traits across four yeast strains. *PLoS Genet*. 2012;8(3):e1002570. doi: 10.1371/journal.pgen.1002570 PMID: 22438822
70. Linder RA, Seidl F, Ha K, Ehrenreich IM. The complex genetic and molecular basis of a model quantitative trait. *Mol Biol Cell*. 2016;27(1):209-218. doi: 10.1091/mbc.E15-06-0408 PMID: 26510497

## QTL Mapping of Yeast Cross Protection

71. Creusot F, Verdiere J, Gaisne M, Slonimski PP. *CYP1 (HAP1)* regulator of oxygen-dependent gene expression in yeast. I. Overall organization of the protein sequence displays several novel structural domains. *J Mol Biol.* 1988;204(2):263-276. doi: PMID: 2851658
72. Pfeifer K, Kim KS, Kogan S, Guarente L. Functional dissection and sequence of yeast *HAP1* activator. *Cell.* 1989;56(2):291-301. doi: PMID: 2643482
73. Zhang L, Hach A. Molecular mechanism of heme signaling in yeast: the transcriptional activator Hap1 serves as the key mediator. *Cell Mol Life Sci.* 1999;56(5-6):415-426. doi: PMID: 11212295
74. Hickman MJ, Winston F. Heme levels switch the function of Hap1 of *Saccharomyces cerevisiae* between transcriptional activator and transcriptional repressor. *Mol Cell Biol.* 2007;27(21):7414-7424. doi: 10.1128/MCB.00887-07 PMID: 17785431
75. Tamura K, Gu Y, Wang Q, Yamada T, Ito K, Shimoi H. A *hap1* mutation in a laboratory strain of *Saccharomyces cerevisiae* results in decreased expression of ergosterol-related genes and cellular ergosterol content compared to sake yeast. *J Biosci Bioeng.* 2004;98(159-166). doi: 10.1016/S1389-1723(04)00260-9 PMID: 16233684
76. Ter Linde JJ, Steensma HY. A microarray-assisted screen for potential Hap1 and Rox1 target genes in *Saccharomyces cerevisiae*. *Yeast.* 2002;19(10):825-840. doi: 10.1002/yea.879 PMID: 12112237
77. Winkler H, Adam G, Mattes E, Schanz M, Hartig A, Ruis H. Co-ordinate control of synthesis of mitochondrial and non-mitochondrial hemoproteins: a binding site for the *HAP1 (CYP1)* protein in the UAS region of the yeast catalase T gene (*CTT1*). *EMBO J.* 1988;7(6):1799-1804. doi: PMID: 2844525
78. Gaisne M, Becam AM, Verdiere J, Herbert CJ. A 'natural' mutation in *Saccharomyces cerevisiae* strains derived from S288c affects the complex regulatory gene *HAP1 (CYP1)*. *Curr Genet.* 1999;36(195-200). doi: PMID: 10541856
79. Steinmetz LM, Sinha H, Richards DR, Spiegelman JI, Oefner PJ, McCusker JH, et al. Dissecting the architecture of a quantitative trait locus in yeast. *Nature.* 2002;416(326-330). doi: PMID: 11907579
80. Abdulrehman D, Monteiro PT, Teixeira MC, Mira NP, Lourenco AB, dos Santos SC, et al. YEASTRACT: providing a programmatic access to curated transcriptional regulatory associations in *Saccharomyces cerevisiae* through a web services interface. *Nucleic Acids Res.* 2011;39(Database issue):D136-140. doi: 10.1093/nar/gkq964 PMID: 20972212
81. Pinkham JL, Wang Z, Alsina J. Heme regulates *SOD2* transcription by activation and repression in *Saccharomyces cerevisiae*. *Curr Genet.* 1997;31(4):281-291. doi: PMID: 9108135
82. Wong CM, Ching YP, Zhou Y, Kung HF, Jin DY. Transcriptional regulation of yeast peroxiredoxin gene *TSA2* through Hap1p, Rox1p, and Hap2/3/5p. *Free Radic Biol Med.* 2003;34(5):585-597. doi: PMID: 12614847
83. Berry DB, Guan Q, Hose J, Haroon S, Gebbia M, Heisler LE, et al. Multiple means to the same end: the genetic basis of acquired stress resistance in yeast. *PLoS Genet.* 2011;7(11):e1002353. doi: 10.1371/journal.pgen.1002353 PMID: 22102822
84. Guan Q, Haroon S, Bravo DG, Will JL, Gasch AP. Cellular memory of acquired stress resistance in *Saccharomyces cerevisiae*. *Genetics.* 2012;192(2):495-505. doi: 10.1534/genetics.112.143016 PMID: 22851651
85. Hon T, Dodd A, Dirmeier R, Gorman N, Sinclair PR, Zhang L, et al. A mechanism of oxygen sensing in yeast. Multiple oxygen-responsive steps in the heme biosynthetic pathway affect Hap1 activity. *J Biol Chem.* 2003;278(50):50771-50780. doi: 10.1074/jbc.M303677200 PMID: 14512429



## QTL Mapping of Yeast Cross Protection

86. Elfving N, Chereji RV, Bharatula V, Bjorklund S, Morozov AV, Broach JR. A dynamic interplay of nucleosome and Msn2 binding regulates kinetics of gene activation and repression following stress. *Nucleic Acids Res.* 2014;42(9):5468-5482. doi: 10.1093/nar/gku176 PMID: 24598258
87. Philpott CC, Leidgens S, Frey AG. Metabolic remodeling in iron-deficient fungi. *Biochimica et Biophysica Acta (BBA) - Molecular Cell Research.* 2012;1823(9):1509-1520. doi: 10.1016/j.bbamcr.2012.01.012 PMID:
88. Fraser HB, Moses AM, Schadt EE. Evidence for widespread adaptive evolution of gene expression in budding yeast. *Proc Natl Acad Sci U S A.* 2010;107(2977-2982). doi: 10.1073/pnas.0912245107 PMID: 20133628
89. Chang J, Zhou Y, Hu X, Lam L, Henry C, Green EM, et al. The molecular mechanism of a *cis*-regulatory adaptation in yeast. *PLoS Genet.* 2013;9(e1003813). doi: 10.1371/journal.pgen.1003813 PMID: 24068973
90. Mitchell A, Romano GH, Groisman B, Yona A, Dekel E, Kupiec M, et al. Adaptive prediction of environmental changes by microorganisms. *Nature.* 2009;460(7252):220-224. doi: 10.1038/nature08112 PMID: 19536156
91. Kim HS, Fay JC. Genetic variation in the cysteine biosynthesis pathway causes sensitivity to pharmacological compounds. *Proc Natl Acad Sci U S A.* 2007;104(49):19387-19391. doi: 10.1073/pnas.0708194104 PMID: 18042712
92. Winzeler EA, Shoemaker DD, Astromoff A, Liang H, Anderson K, Andre B, et al. Functional characterization of the *S. cerevisiae* genome by gene deletion and parallel analysis. *Science.* 1999;285(901-906). doi: PMID: 10436161
93. Haley CS, Knott SA. A simple regression method for mapping quantitative trait loci in line crosses using flanking markers. *Heredity (Edinb).* 1992;69(4):315-24. doi: PMID: 16718932
94. Broman KW, Wu H, Sen S, Churchill GA. R/qtl: QTL mapping in experimental crosses. *Bioinformatics.* 2003;19(7):889-890. doi: PMID: 12724300
95. Gasch AP. Yeast genomic expression studies using DNA microarrays. *Methods Enzymol.* 2002;350(393-414). doi: PMID: 12073326
96. Livak KJ, Schmittgen TD. Analysis of Relative Gene Expression Data Using Real-Time Quantitative PCR and the  $2^{-\Delta\Delta CT}$  Method. *Methods.* 2001;25(4):402-408. doi: 10.1006/meth.2001.1262 PMID: 11846609
97. Bradford MM. A rapid and sensitive method for the quantitation of microgram quantities of protein utilizing the principle of protein-dye binding. *Anal Biochem.* 1976;72(248-54). doi: PMID: 942051
98. Beers RF, Jr., Sizer IW. A spectrophotometric method for measuring the breakdown of hydrogen peroxide by catalase. *J Biol Chem.* 1952;195(1):133-140. doi: PMID: 14938361
